# Supplementary material for: A 3D hierarchical hybrid nanostructure of carbon nanotubes and activated carbon for high-performance supercapacitors
Source: Royal Society of Chemistry journal article supplement (doi:10.1039/c3ta14723a), 2013-12-10
Supplement: c3ta14723a.pdf [file c3ta14723a.pdf]

Supporting Information for

A 3D hierarchical hybrid nanostructure of carbon  
nanotubes and activated carbon for high-performance  
supercapacitors

Fengyu Zhou, Qinglei Liu<sup>\*</sup>, Danmiao Kang, Jiajun Gu, Wang Zhang,  
and Di Zhang<sup>\*</sup>

State Key Laboratory of Metal Matrix Composites, Shanghai Jiao Tong  
University, Shanghai 200240, China

Corresponding authors:

Qinglei Liu, [liuqinglei@sjtu.edu.cn](mailto:liuqinglei@sjtu.edu.cn)

Di Zhang, [zhangdi@sjtu.edu.cn](mailto:zhangdi@sjtu.edu.cn)

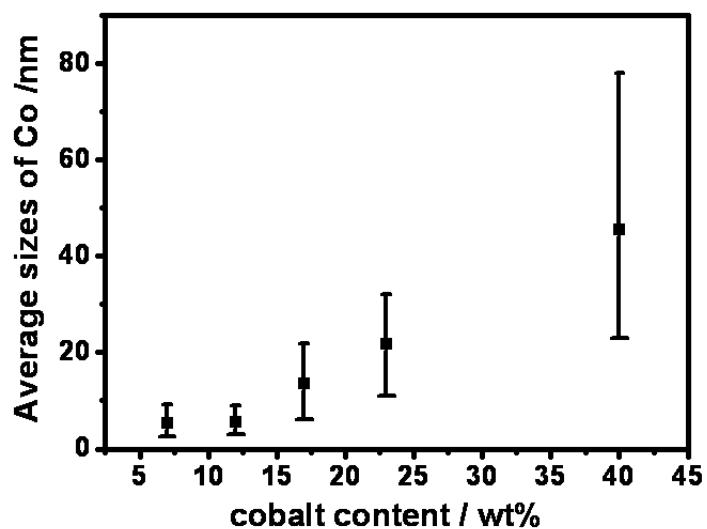

Figure S1 The size distribution of Co nanoparticles with the weight ratio of Co.

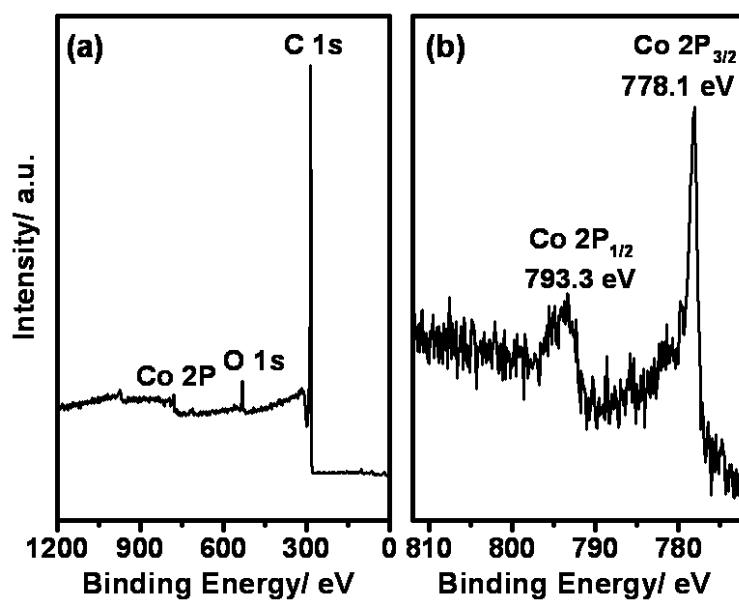

Figure S2 (a) XPS survey spectrum and (b) Co 2p XPS spectrum of CNT/Co/BAC-12 sample.
